# Supplementary material for: METTL3-mediated m6A modification is required for cerebellar development
Source: PLoS Biol. 2018 Jun 7;16(6):e2004880. doi: 10.1371/journal.pbio.2004880 (PMC6021109; doi:10.1371/journal.pbio.2004880)
Supplement: S7 Table — qRT-PCR, quantitative reverse transcription polymerase chain reaction. (XLSX) [file pbio.2004880.s017.xlsx]

## Sheet: 1
Supplementary Table 7∣Primers used for qRT-PCR and for detection of alternative splicing.
Primer Name	Primer Sequences
Sox2-F	5'-GCGGAGTGGAAACTTTTGTCC-3'
Sox2-R	5'-CGGGAAGCGTGTACTTATCCTT-3'
Gli3-F	5'-CACAGCTCTACGGCGACTG-3'
Gli3-R	5'-CTGCATAGTGATTGCGTTTCTTC-3'
Gli3-m6A-F	5'-CACAGCTCTACGGCGACTG-3'
Gli3-m6A-R	5'-CTGCATAGTGATTGCGTTTCTTC-3'
Cxcr4-F	5'-GAAGTGGGGTCTGGAGACTAT-3'
Cxcr4-R	5'-TTGCCGACTATGCCAGTCAAG-3'
Cxcr4-m6A-F	5'-CCATCCTCTATGCCTTCCTC-3'
Cxcr4-m6A-R	5'-AGTGTCCACCCCGCTTTCCT-3'
Atoh1-F	5'-GGGGTTGTAGTGGACGAGC-3'
Atoh1-R	5'-CGTTGTTGAAGGACGGGATAAC-3'
Atoh1-m6A-F	5'-TCTGATGAGGCCAGTTAGGA-3'
Atoh1-m6A-R	5'-AAGGGTGCAGGGATATTTGT-3'
Yap1-F	5'-TACTGATGCAGGTACTGCGG-3'
Yap1-R	5'-TCAGGGATCTCAAAGGAGGAC-3'
Yap1-m6A-F	5'-AGGAGACACCATCAGCCAAAG-3'
Yap1-m6A-R	5'-GGAGGGCTTCCAGGTAGTCG-3'
Notch2-F	5'-GACTGCCAATACTCCACCTCT-3'
Notch2-R	5'-CCATTTTCGCAGGGATGAGAT-3'
Notch2-m6A-F	5'-GGTAGTAGCAGTGCAGGAAGCT-3'
Notch2-m6A-R	5'-GGACCATGCCAAACATTTCA-3'
Jag1-F	5'-CCTCGGGTCAGTTTGAGCTG-3'
Jag1-R	5'-CCTTGAGGCACACTTTGAAGTA-3'
Dapk1-F	5'-ATGACTGTGTTCAGGCAGGAA-3'
Dapk1-R	5'-CCGGTACTTTTCTCACGACATTT-3'
Dapk1-m6A-F	5'-ACTGAGTCGCCTGCTTGACC-3'
Dapk1-m6A-R	5'-AGCCCTGTTGTTGACGTTGT-3'
Ngfr-F	5'-CGAATGCGAGGAGATCCCTG-3'
Ngfr-R	5'-GTCACCGTATCGGCCACTG-3'
Ngfr-m6A-F	5'-CGACGCTCGATGCCCTTTTA-3'
Ngfr-m6A-R	5'-TGGTTTGGGGAGCGGGACAC-3'
Fadd-F	5'-CTGCGCCGACACGATCTAC-3'
Fadd-R	5'-CGGGCCAGTCTTTTCCAGT-3'
Fadd-m6A-F	5'-GGCCAAGATGGATGGGATTG-3'
Fadd-m6A-R	5'-AGGCGTTCTTCTTCTCAGCATT-3'
Actb-F	5'-TTCACCACCACAGCTGAGAG-3'
Actb-R	5'-ATAGTGATGACCTGGCCGTC-3'
Grin1-AS-F	5'-TGCCCGTAGGAAGCAGATGCA-3'
Grin1-AS-R	5'-ACAGACAAGGCGGCCCGTTAG-3'
Grin1-m6A-F	5'-GAGTGGTAGAGCAGAGCCC-3'
Grin1-m6A-R	5'-TGTCTTTGGAGGACCTACG-3'
Atp2b3-AS-F	5'-CCTGGGAAGGATGAGATGACTG-3'
Atp2b3-AS-R	5'-TCATAAAGCGAGCTACGGAATG-3'
Atp2b3-m6A-F	Atp2b3-AS-F
Atp2b3-m6A-R	5'-TCTTGAAGGTACTCACTACCTCCAT-3'
Grm1-AS-F	5'-GCTCCAACACCTTCCTCAACA-3'
Grm1-AS-R	5'-AGGCCGTCTCATTGGTCTTCA-3'
Grm1-m6A-F	5'-GAAAACCCCCACACTGCAGTGAATG-3'
Grm1-m6A-R	Grm1-AS-R
Lrp8-AS-F	5'-GAAGCGGAAGAACACCAAGAG-3'
Lrp8-AS-R	5'-GGACTGAACTCCATGAGGCAC-3'
Lrp8-m6A-F	5'-CAGCAACTATGATCGCCCACT-3'
Lrp8-m6A-R	5'-CAGGCAGCTCGGAAAGAGG-3'
NC-m6A-F	5'-GTGGCTGAGGGCATCAATG-3'
NC-m6A-R	5'-AACCGAATGTCGTCCGAAGAC-3'
